# Supplementary material
Source: Springer Nature journal article supplement (https://www.springermedizin.de/resource/supplementary/12961_2005_24_MOESM3_ESM.pdf/9571310)

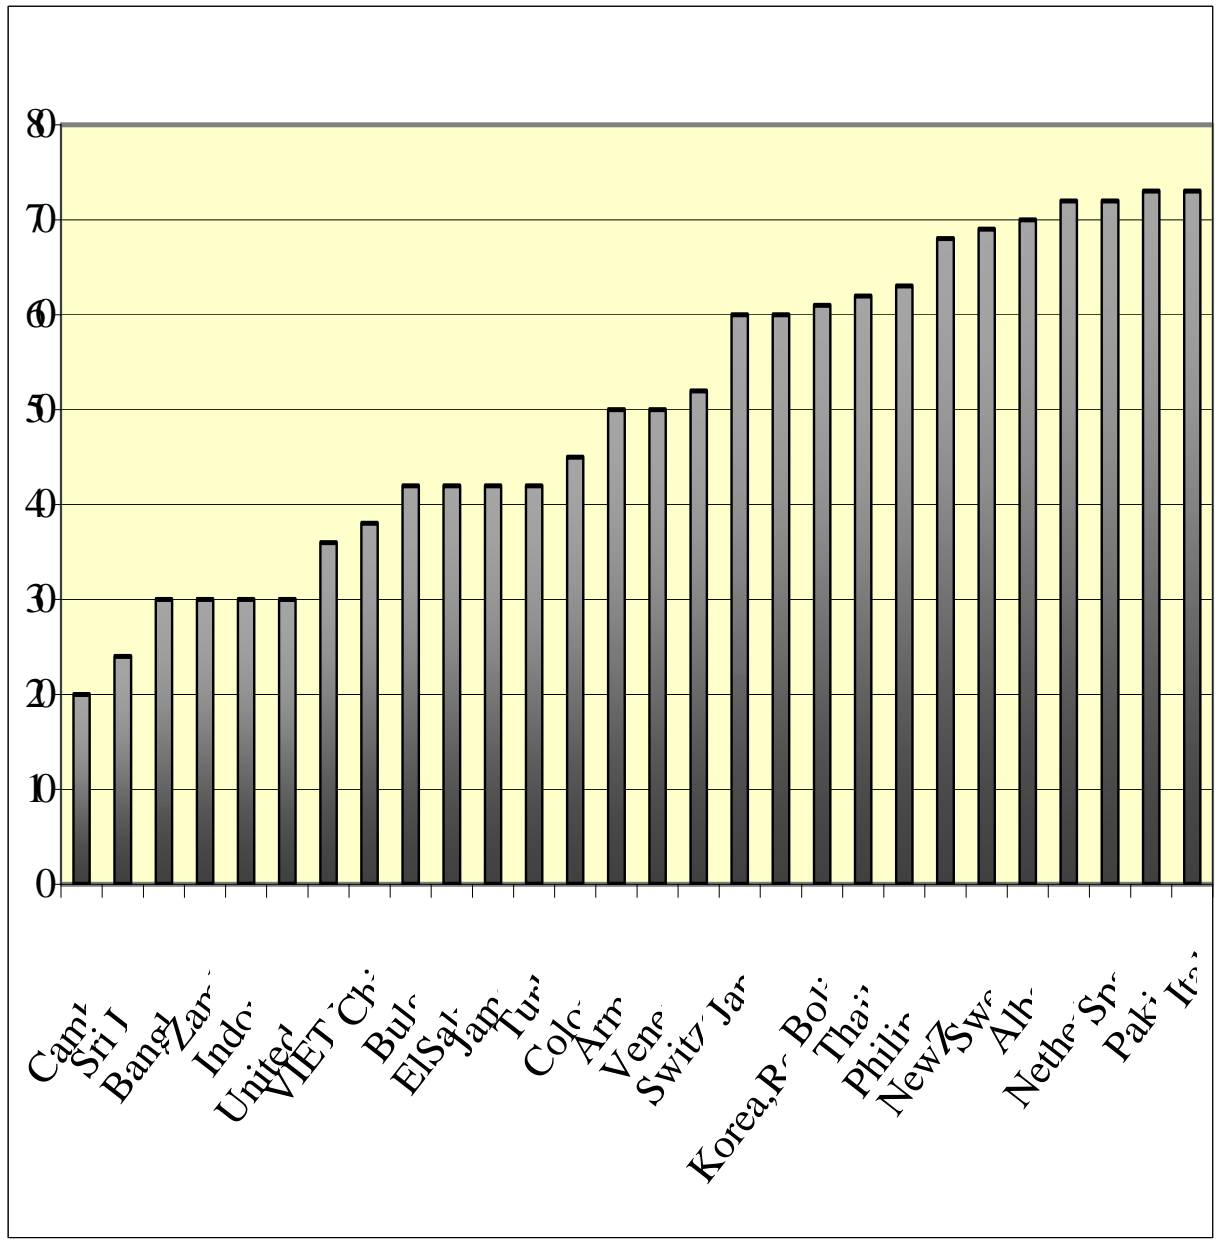

Supplement: MOESM3 [file 9571310]
